# Supplementary material for: Nanoscale convection assisted self-assembly of nanoparticle monolayer
Source: Royal Society of Chemistry journal article supplement (doi:10.1039/c2jm16220b), 2012-01-01
Supplement: c2jm16220b.pdf [file c2jm16220b.pdf]

## Supporting Information

### Nanoscale Convection Assisted Self-assembly of Nanoparticle Monolayer

Lihua Qian<sup>\*a</sup>, Shengjie Zhai<sup>b,c</sup>, Yingtao Jiang<sup>b,c</sup>, and Biswajit Das<sup>b,c</sup>

<sup>a</sup> School of Physics, Huazhong University of Science and Technology, Wuhan, 430074, P. R. China

<sup>b</sup> Department of Electrical and Computer Engineering, University of Nevada, Las Vegas, Nevada 89154, USA

<sup>c</sup> Nevada Nanotechnology Center, College of Engineering, University of Nevada, Las Vegas, Nevada 89154, USA

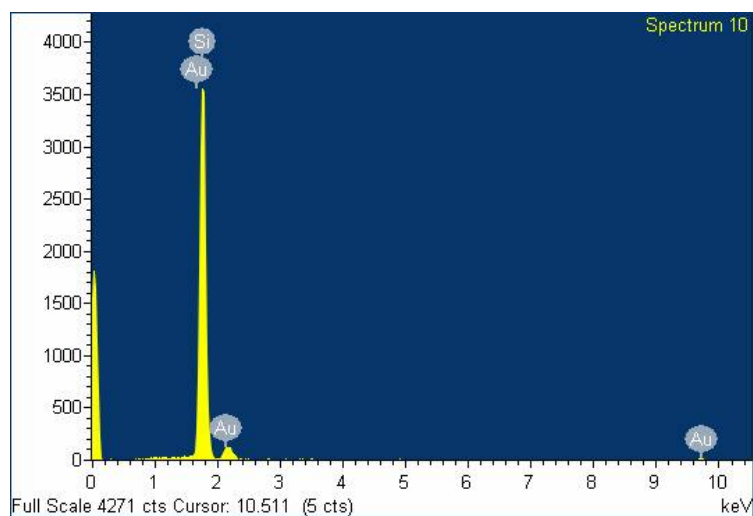

**Figure S1.** EDX spectrum of linear arrays with nanoparticle size of 5 nm indicates the existence of Au and Si elements.
